# Supplementary material for: Dual-Enzyme Cascade Composed of Chitosan Coated FeS2 Nanozyme and Glucose Oxidase for Sensitive Glucose Detection
Source: MDPI journal article supplement (doi:10.3390/molecules28031357), 2023-01-31
Supplement: s1 [file s1]

Table S1. Immobilized enzyme efficiency

| Materials            | Amount of Gox (mg) | Immobilized enzyme<br>Efficiency (%) | Amount of<br>immobilized enzyme<br>(mg) |
|----------------------|--------------------|--------------------------------------|-----------------------------------------|
| FeS <sub>2</sub>     | 0.1                | 15.2                                 | 0.0312                                  |
| FeS <sub>2</sub>     | 0.3                | 16.6                                 | 0.0738                                  |
| FeS <sub>2</sub>     | 0.5                | 20.3                                 | 0.1015                                  |
| FeS <sub>2</sub>     | 0.75               | 12.2                                 | 0.0915                                  |
| FeS <sub>2</sub>     | 1                  | 9.8                                  | 0.098                                   |
| FeS <sub>2</sub> /CS | 0.1                | 70.2                                 | 0.0702                                  |
| FeS <sub>2</sub> /CS | 0.3                | 75.4                                 | 0.2262                                  |
| FeS <sub>2</sub> /CS | 0.5                | 80.3                                 | 0.4015                                  |
| FeS <sub>2</sub> /CS | 0.75               | 51.5                                 | 0.35625                                 |
| FeS <sub>2</sub> /CS | 1                  | 30.3                                 | 0.303                                   |

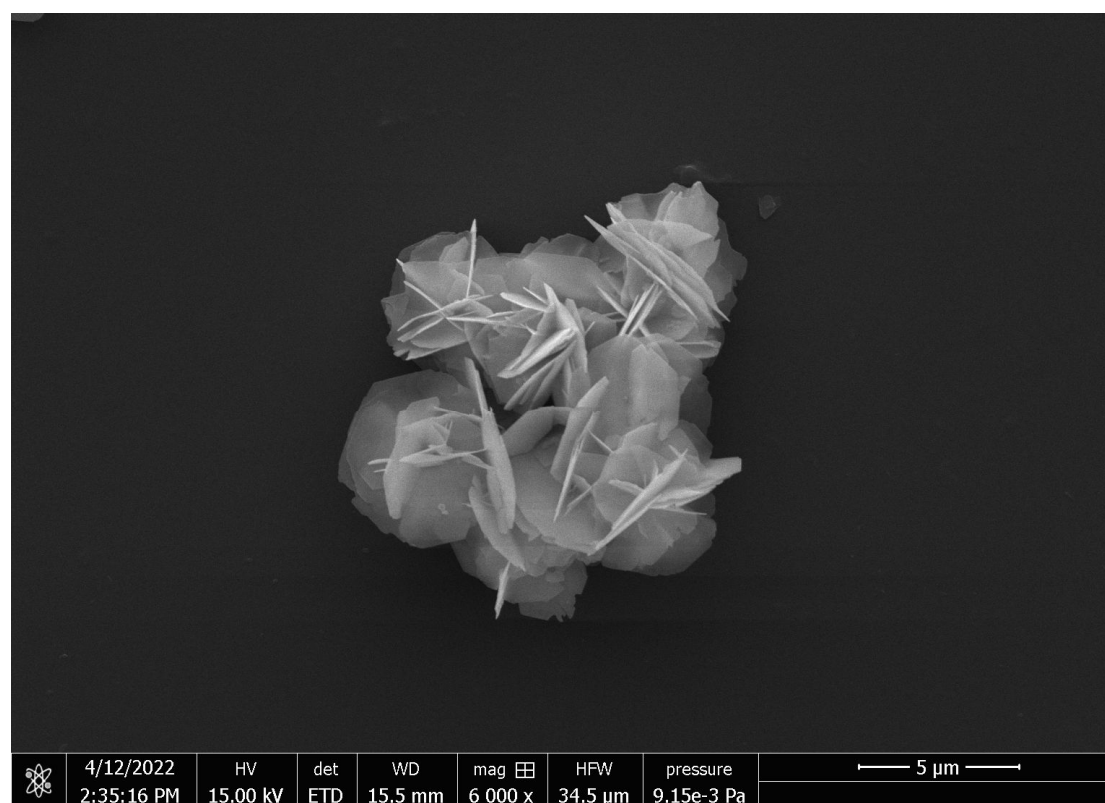Figure S1. Morphology of FeS<sub>2</sub>

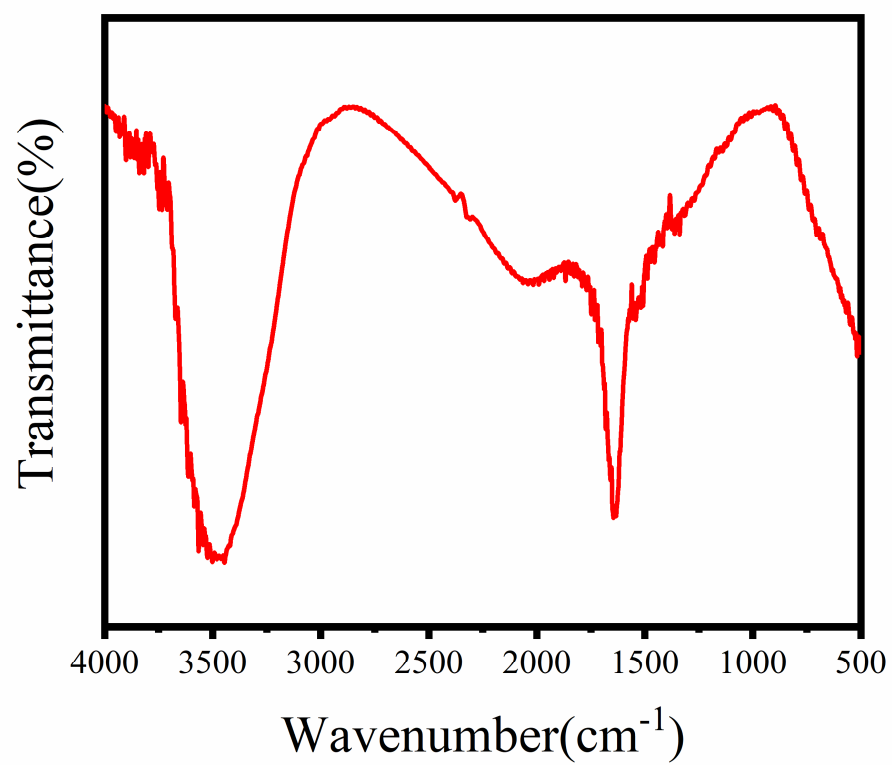

Figure S2. FTIR absorption spectrum of Gox.

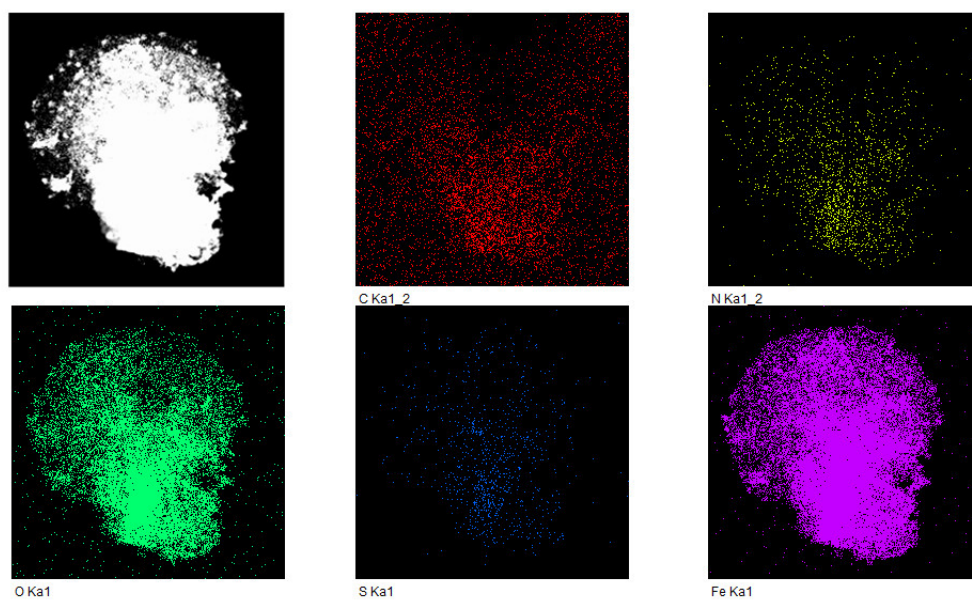

Figure S3. Elemental distribution of FeS<sub>2</sub>/CS@Gox.

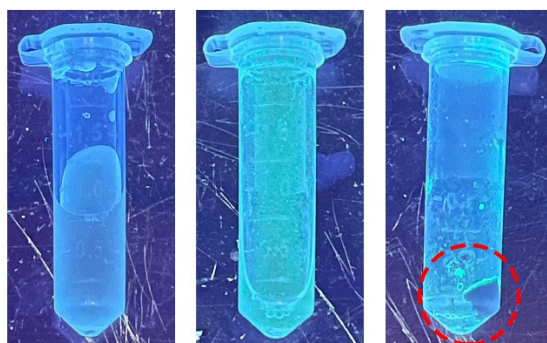

Figure S4. The Color of FeS<sub>2</sub>/CS@Gox under UV light.

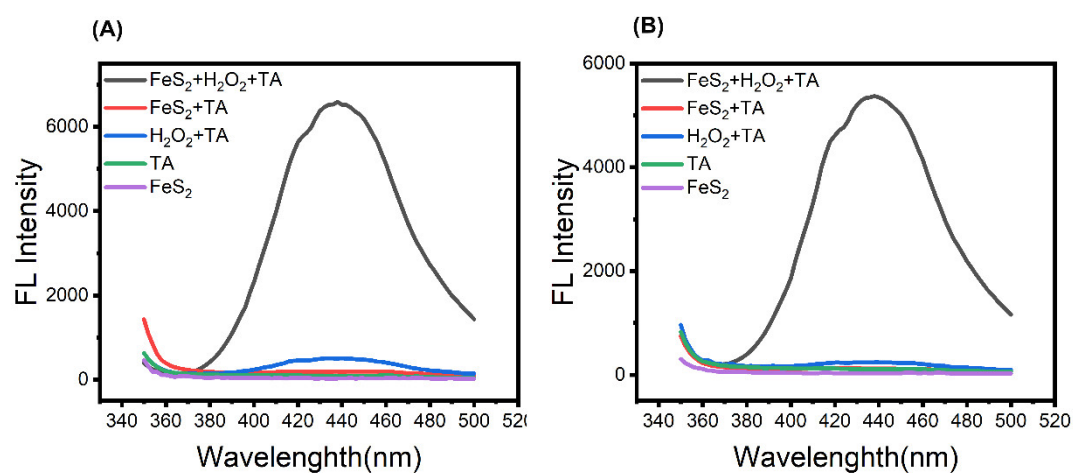

Figure S5. Hydroxyl radicals produced by FeS<sub>2</sub>.

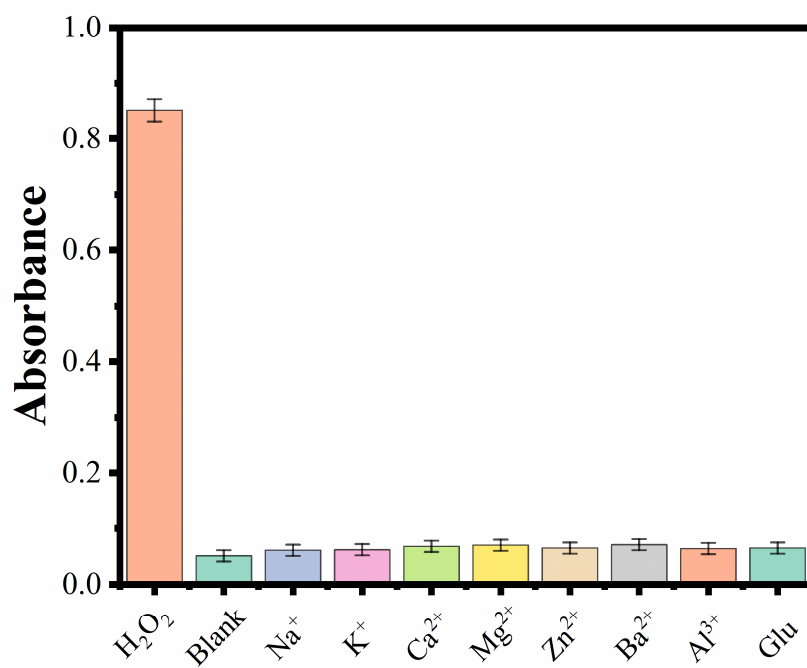

Figure S6. Selectivity of FeS<sub>2</sub> to H<sub>2</sub>O<sub>2</sub>.

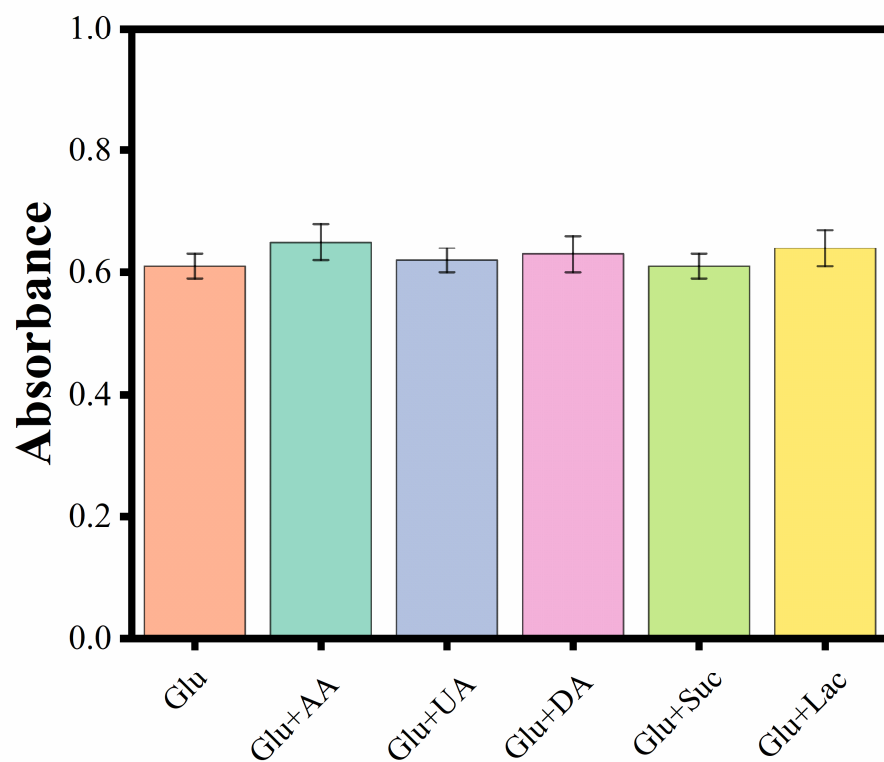

Figure S7. Selectivity of FeS<sub>2</sub>/CS@Gox to glucose.

AA: ascorbic acid; UA: uric acid; DA: dopamine; Suc: sucrose; Lac: lactic acid.
